# Supplementary figures and images for: TGF-β2 silencing to target biliary-derived liver diseases
Source: PubMed Central journal article supplement — Gut. 2020 Jan 28;69(9):1677–90. doi: 10.1136/gutjnl-2019-319091 (PMC7456737; doi:10.1136/gutjnl-2019-319091), 2020-01-28

## Supplemental Figure 1

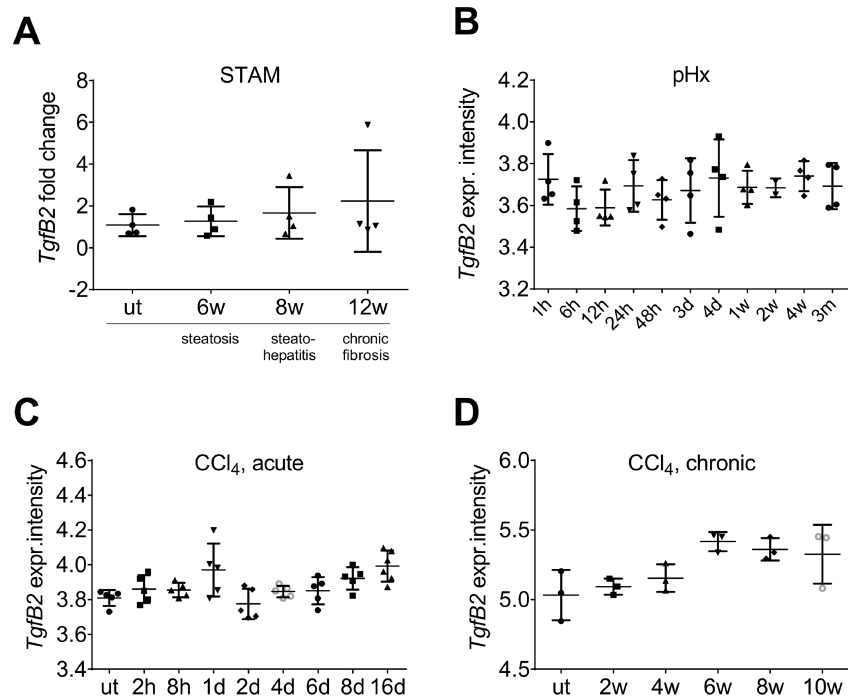

Supplement: gutjnl-2019-319091supp002.pdf [file gutjnl-2019-319091supp002.pdf]

## Supplemental Figure 4

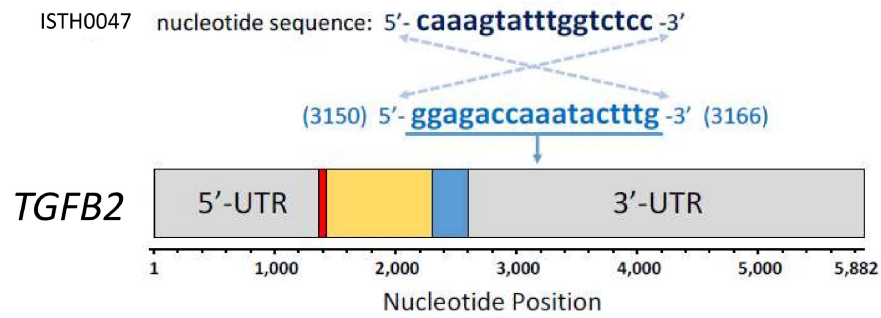

Supplement: gutjnl-2019-319091supp005.pdf [file gutjnl-2019-319091supp005.pdf]

## Supplemental Figure 6

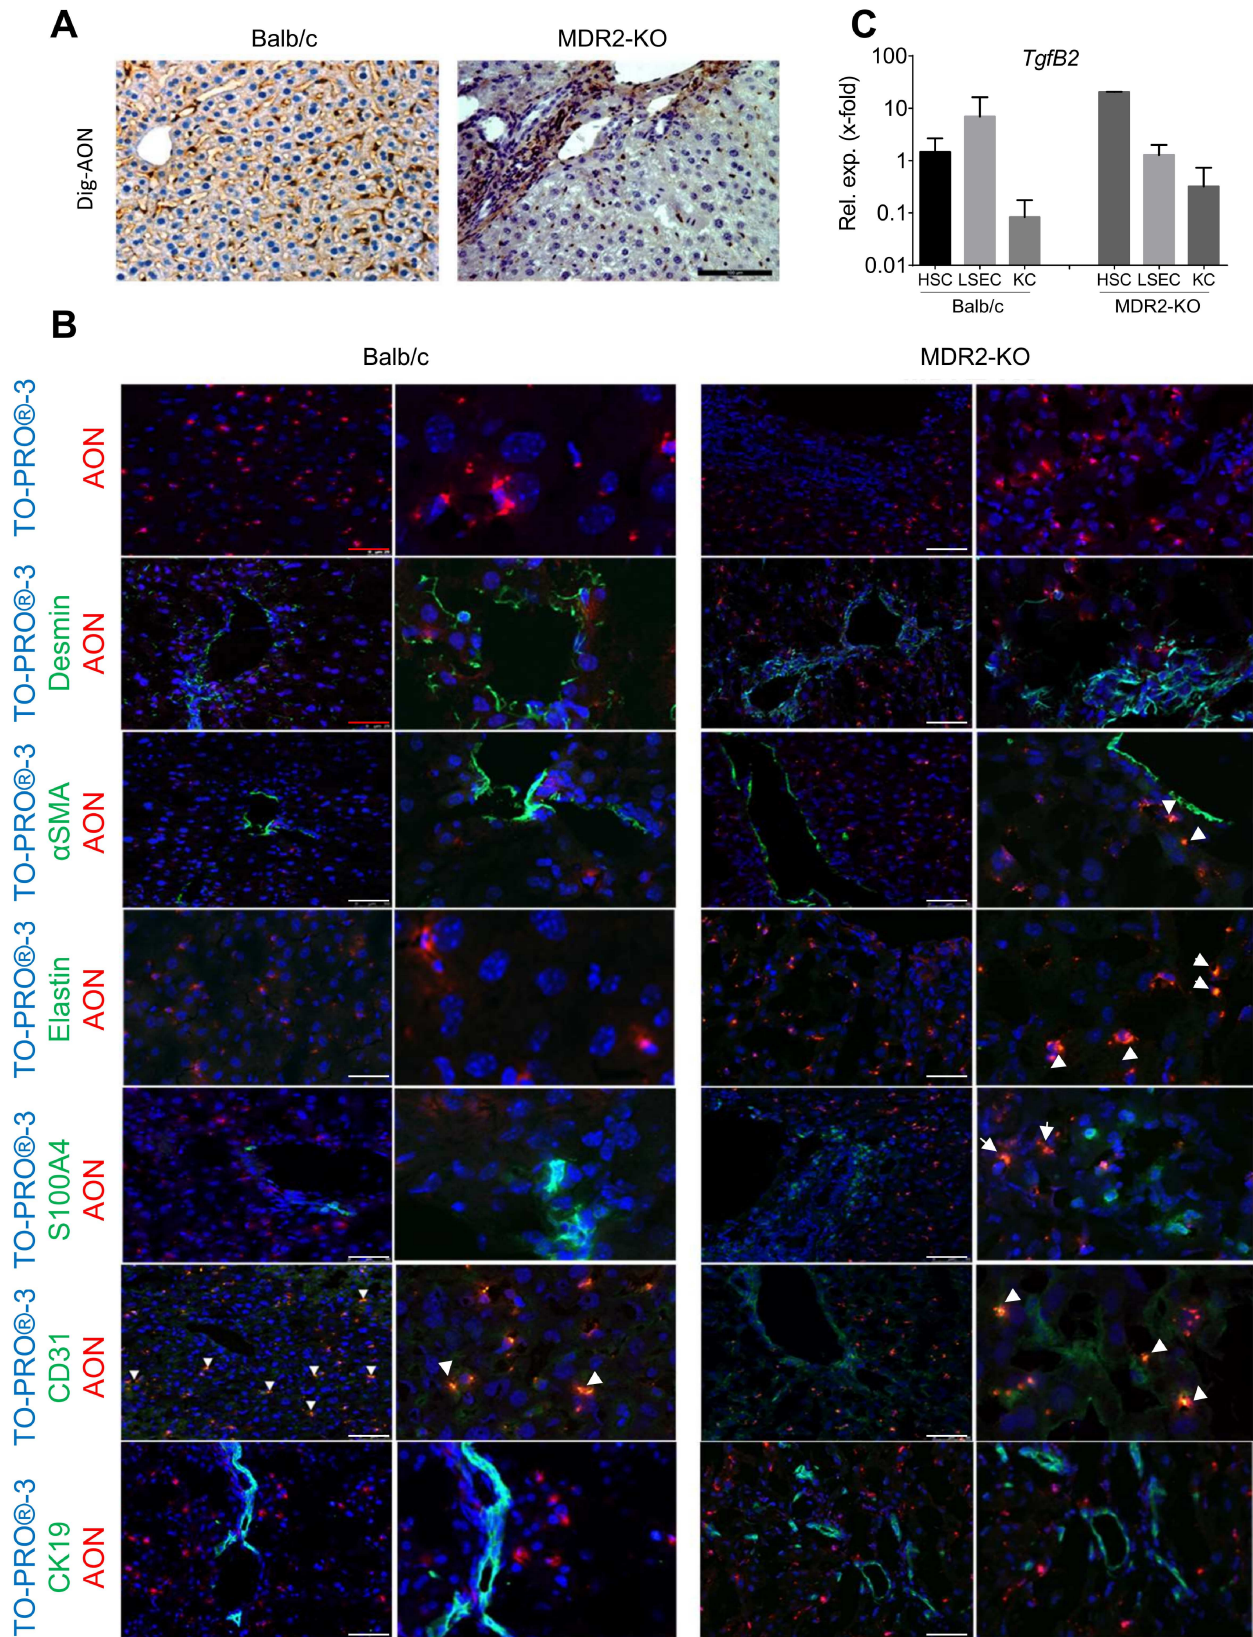

Supplement: gutjnl-2019-319091supp007.pdf [file gutjnl-2019-319091supp007.pdf]
