# Supplementary figures and images for: TGF-β2 silencing to target biliary-derived liver diseases
Source: HighWire-hosted journal article supplement (doi:10.1136/gutjnl-2019-319091), 2020-01-28

Supplemental Figure 2

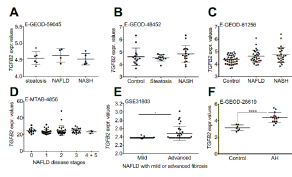

Supplemental Figure 2

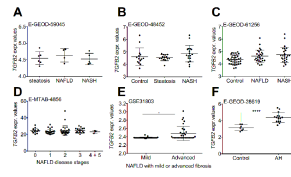

Supplemental Figure 2

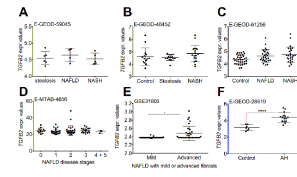

Supplement: gutjnl-2019-319091supp003_data_supplement.pdf [file gutjnl-2019-319091supp003_data_supplement.pdf]

Supplemental Figure 3

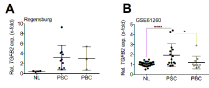

Supplemental Figure 3

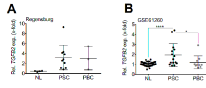

Supplemental Figure 3

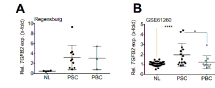

Supplement: gutjnl-2019-319091supp004_data_supplement.pdf [file gutjnl-2019-319091supp004_data_supplement.pdf]

## Supplemental Figure 4

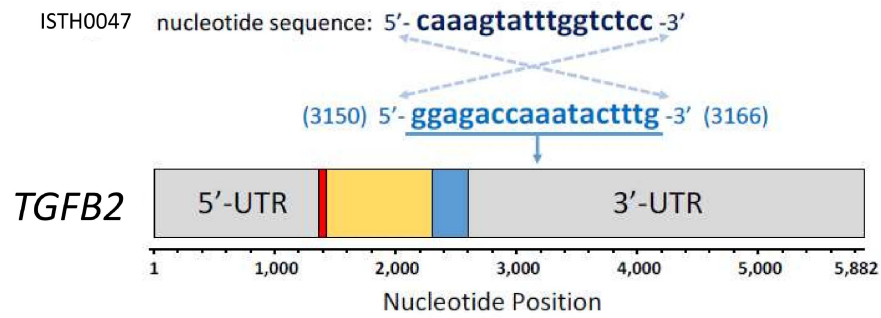

Supplement: gutjnl-2019-319091supp005_data_supplement.pdf [file gutjnl-2019-319091supp005_data_supplement.pdf]

## Supplemental Figure 5

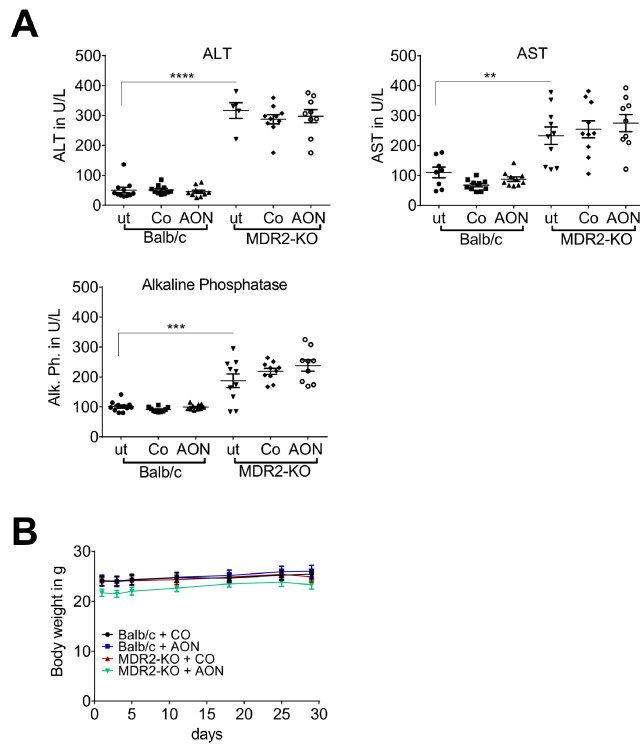

Supplement: gutjnl-2019-319091supp006_data_supplement.pdf [file gutjnl-2019-319091supp006_data_supplement.pdf]

### Supplemental Figure 6

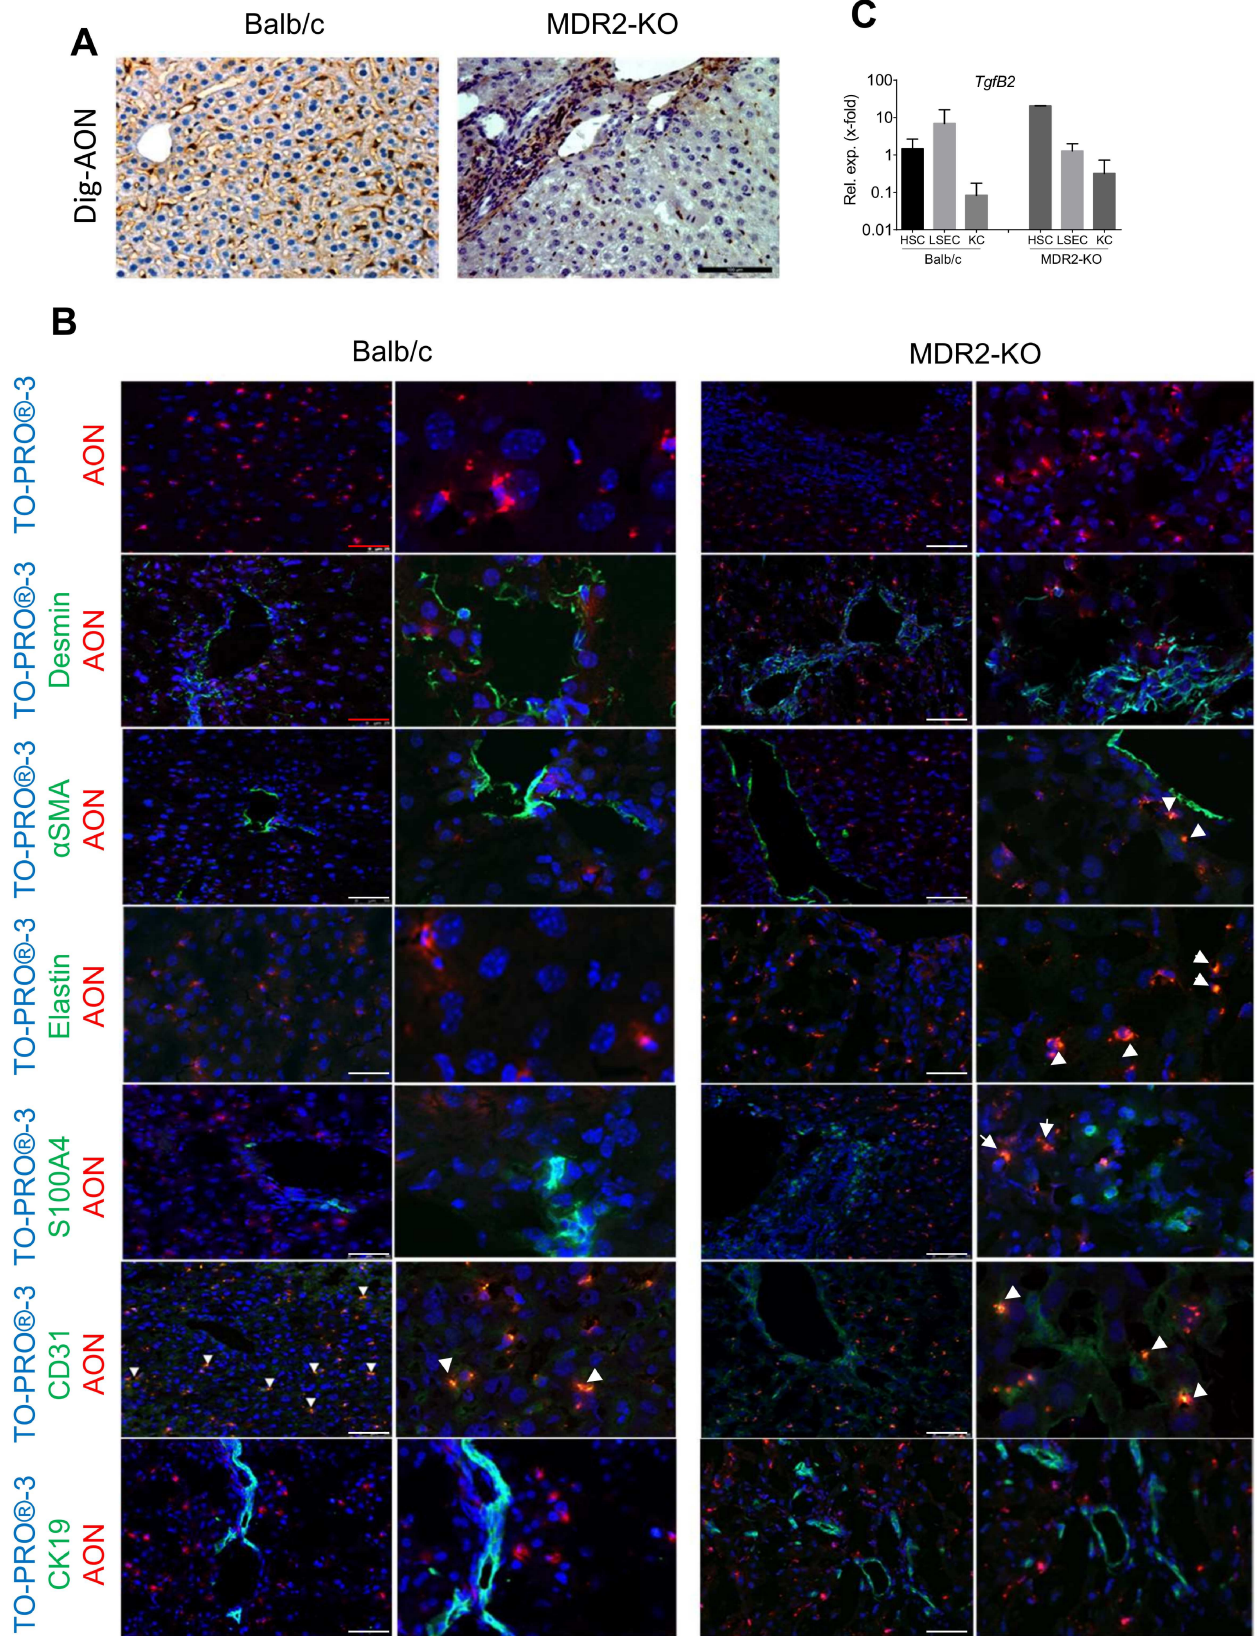

Supplement: gutjnl-2019-319091supp007_data_supplement.pdf [file gutjnl-2019-319091supp007_data_supplement.pdf]

### Supplemental Figure 8

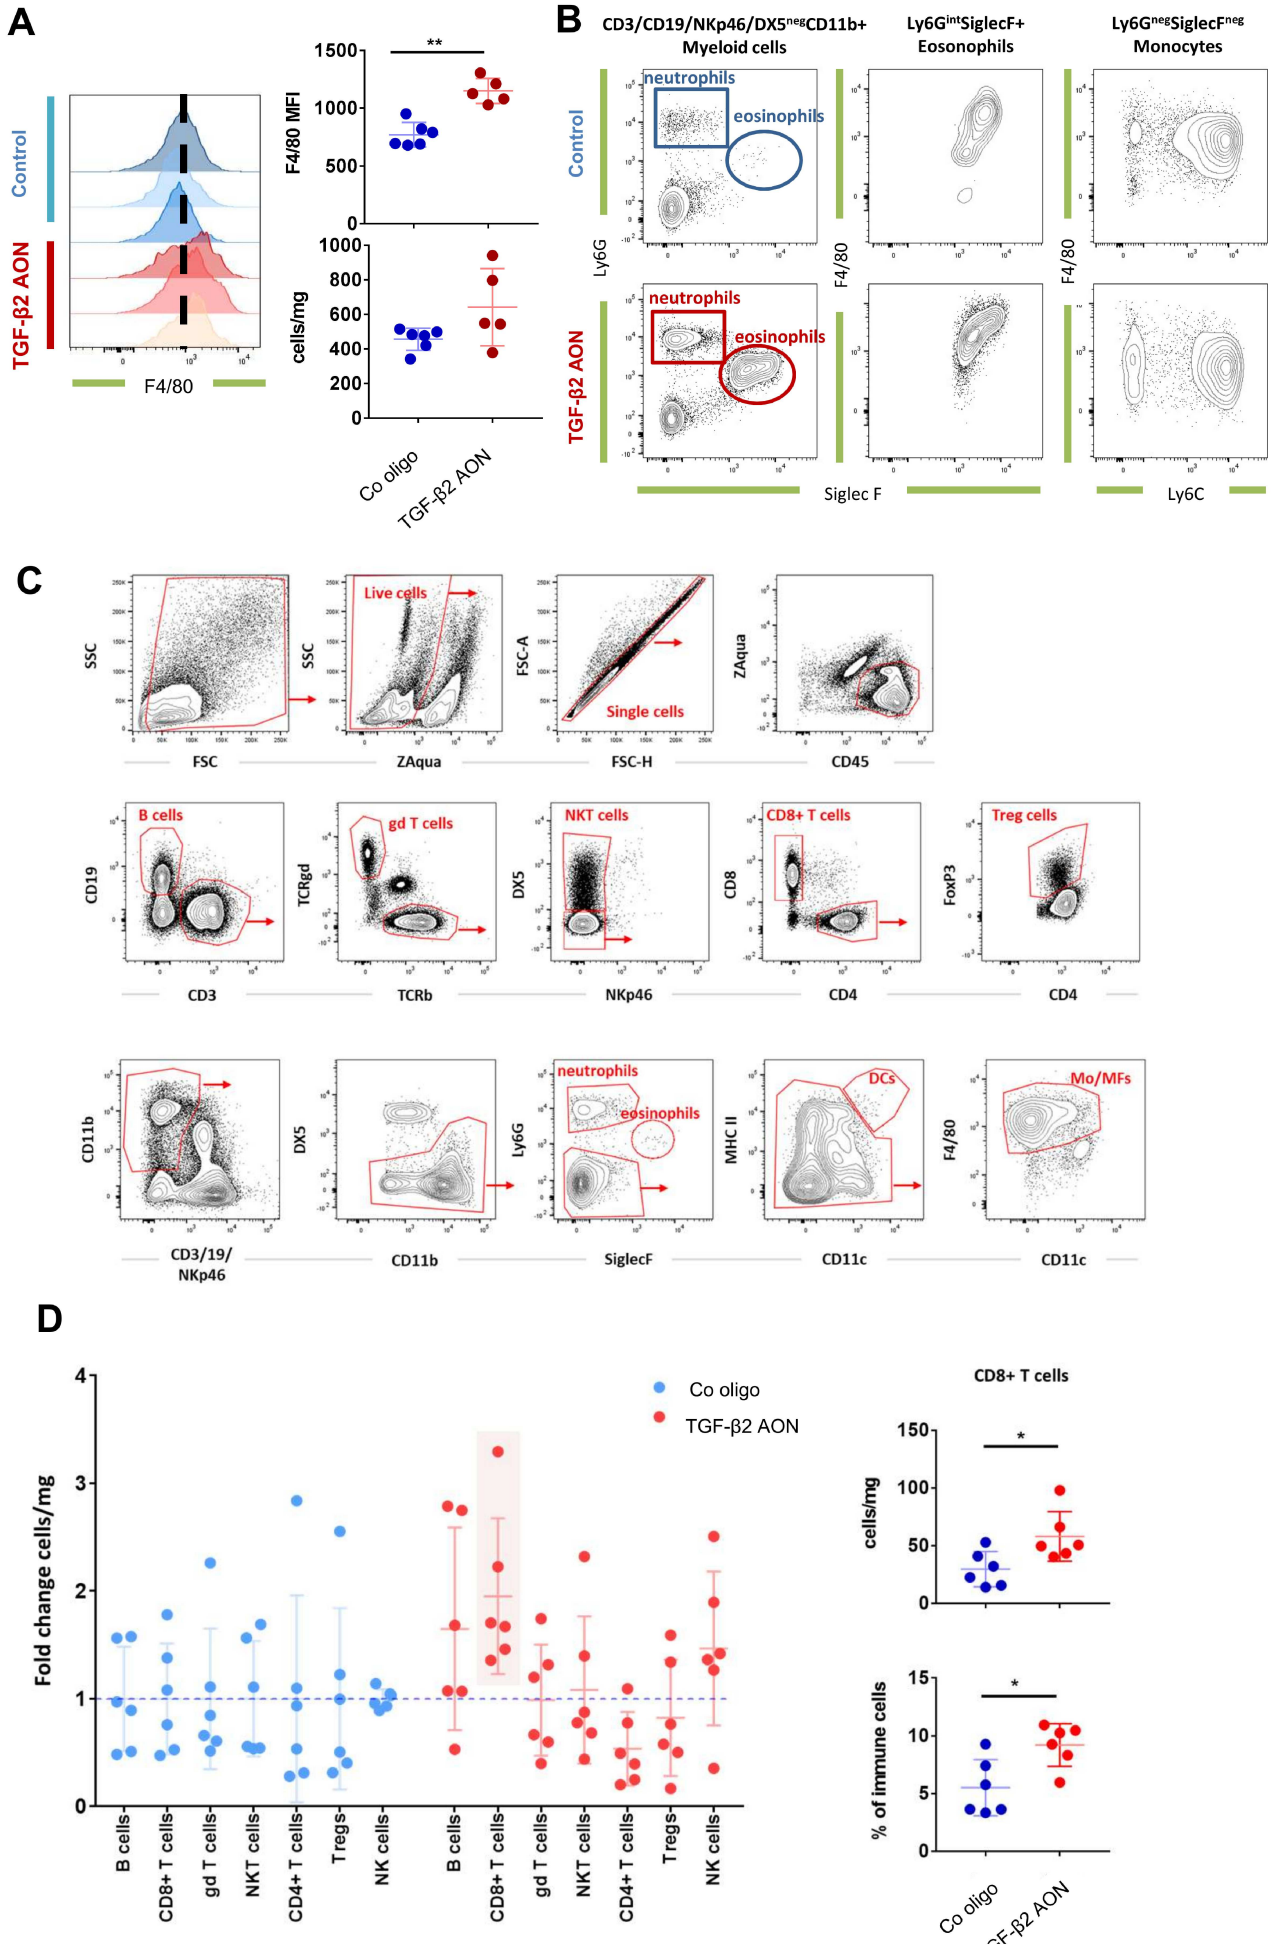

Supplement: gutjnl-2019-319091supp009_data_supplement.pdf [file gutjnl-2019-319091supp009_data_supplement.pdf]

Supplemental Figure 2

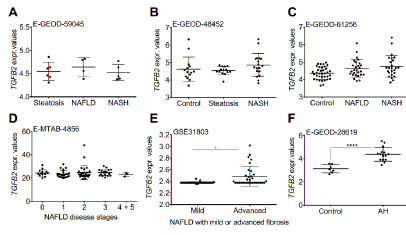

Supplemental Figure 2

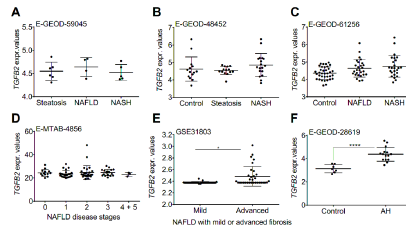

Supplemental Figure 2

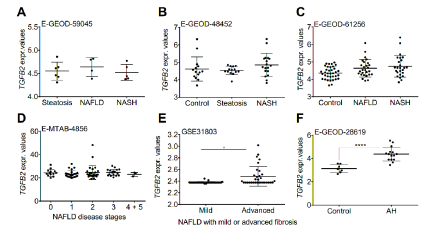

Supplement: gutjnl-2019-319091supp003_data_supplement.pdf [file gutjnl-2019-319091supp003_data_supplement.pdf]

### Supplemental Figure 6

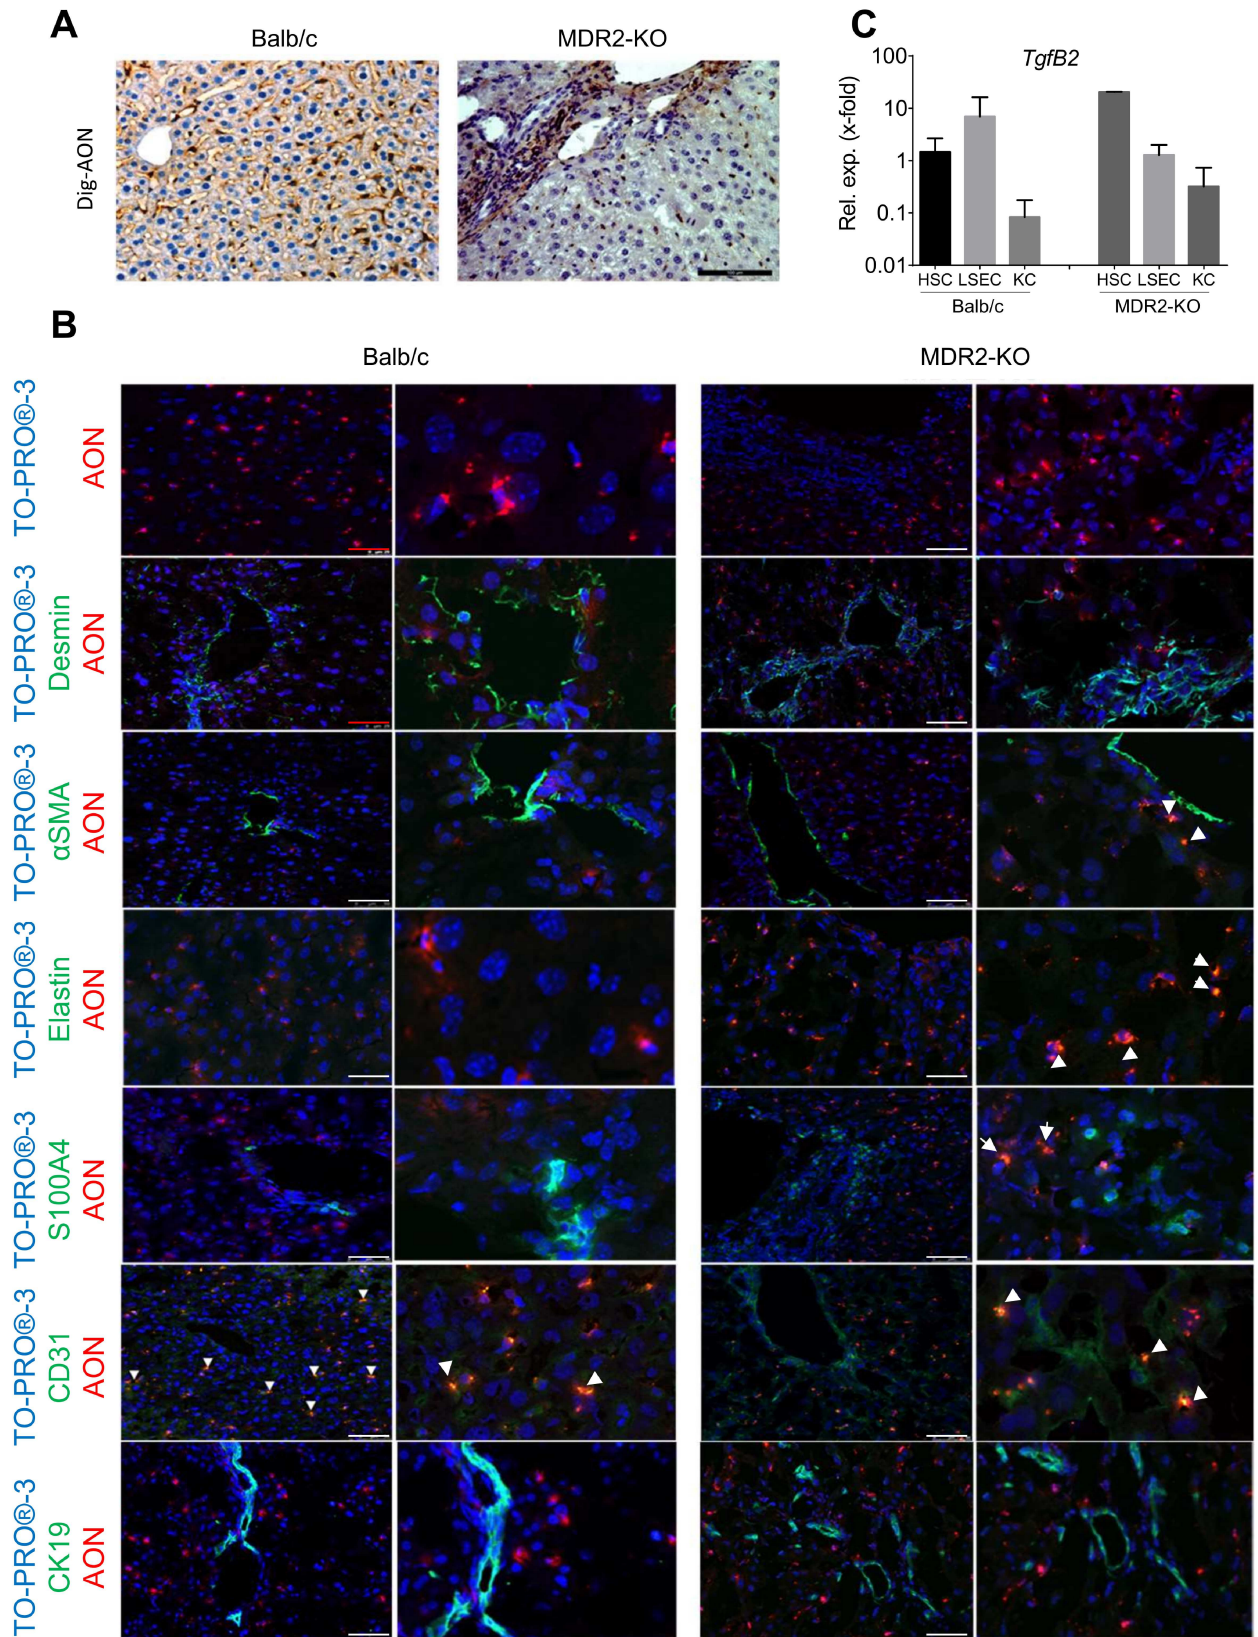

Supplement: gutjnl-2019-319091supp007_data_supplement.pdf [file gutjnl-2019-319091supp007_data_supplement.pdf]

## Supplemental Figure 8

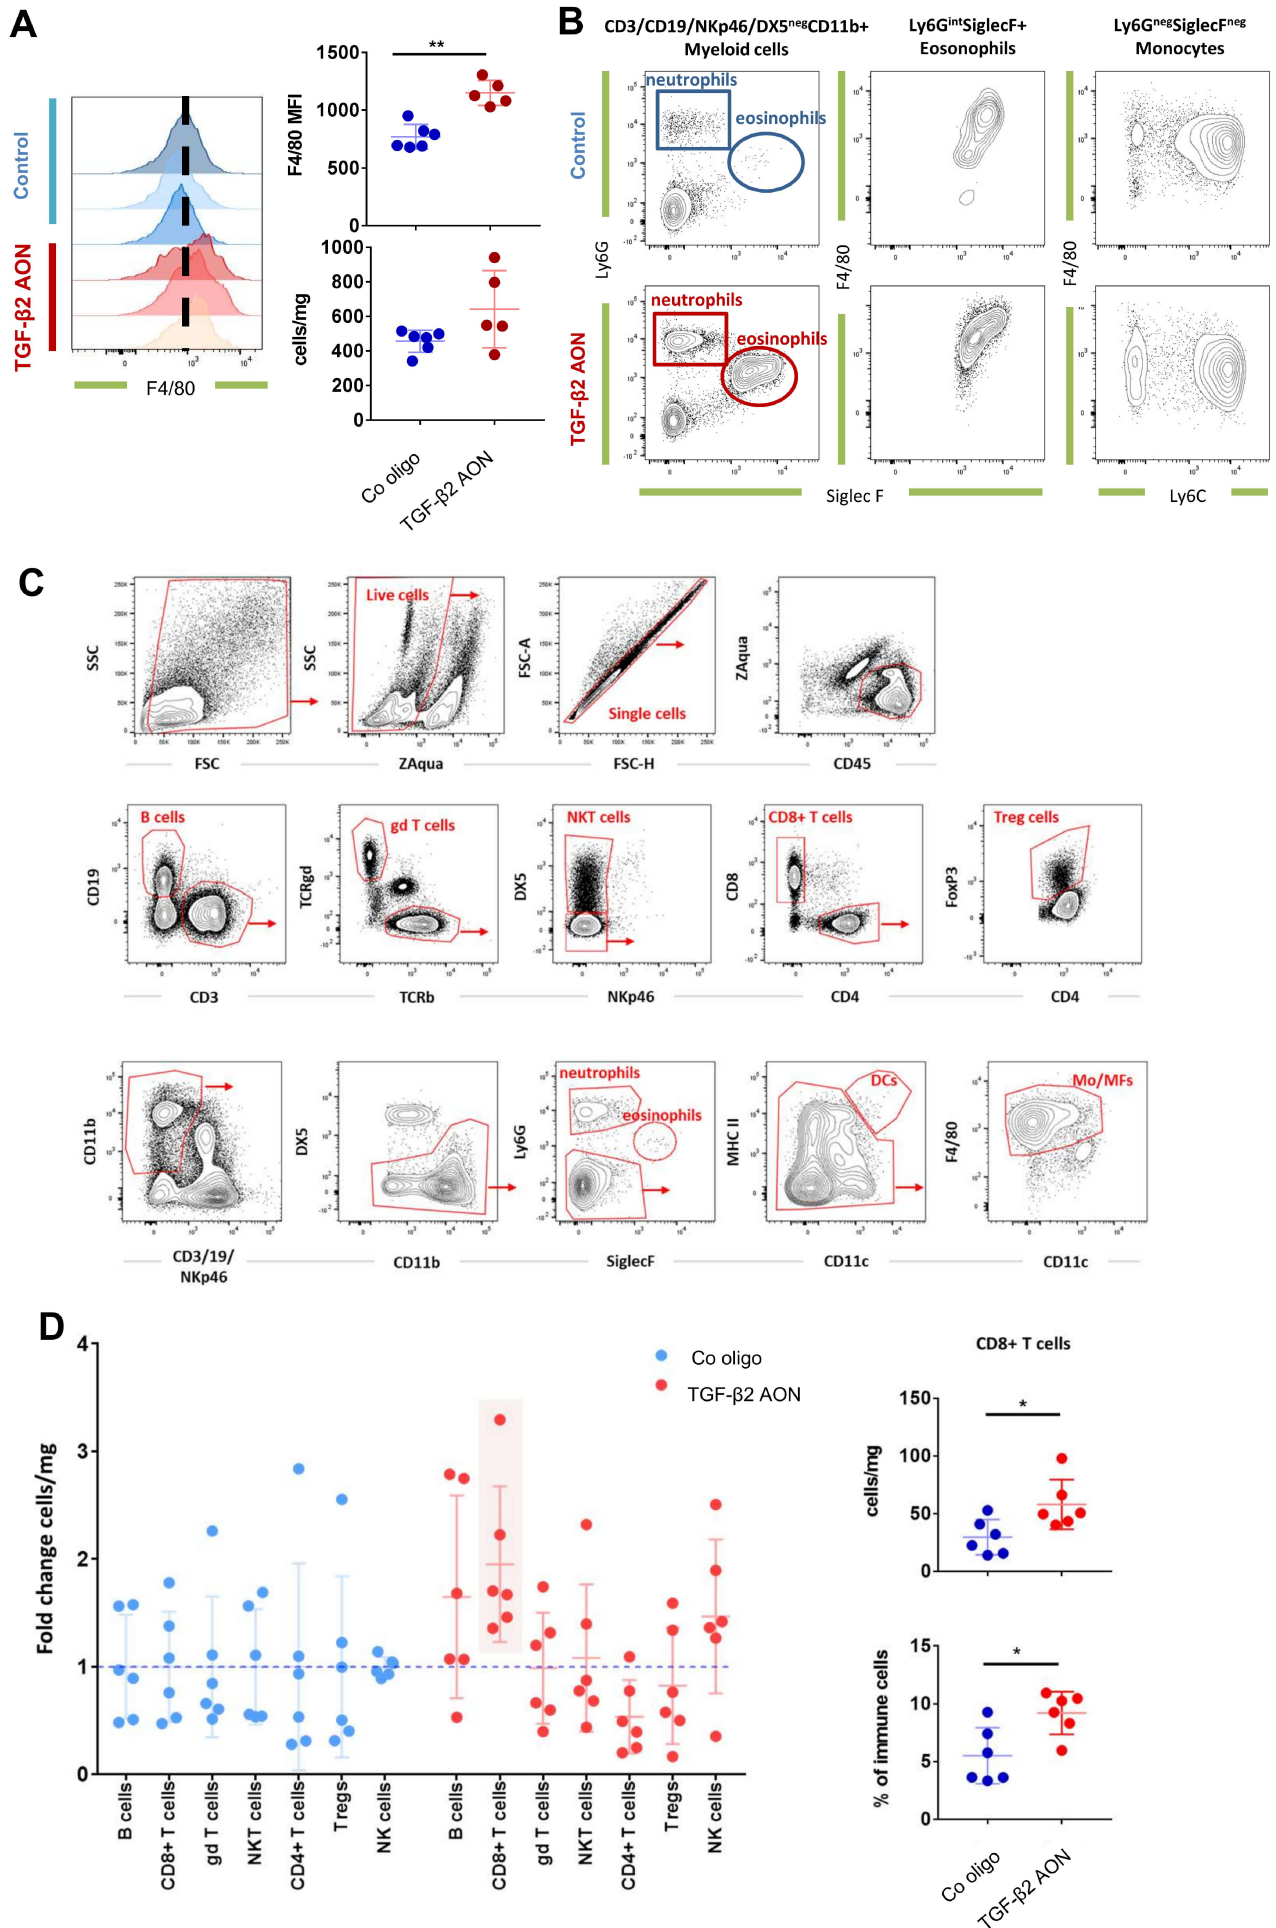

Supplement: gutjnl-2019-319091supp009_data_supplement.pdf [file gutjnl-2019-319091supp009_data_supplement.pdf]
